# Supplementary material
Source: PubMed Central journal article supplement (PMC2277165)
Supplement: tjp0584-0637-SD1.pdf [file tjp0584-0637-SD1.pdf]

Table S1. Pair wise comparisons of mRNA and protein levels between experimental and normal muscles

|                            | Mean | Pairs (n) |     |
|----------------------------|------|-----------|-----|
| <b>Myogenin RNA</b>        |      |           |     |
| SOL Norm/EDL Norm          | 5.96 | 6         | *   |
| EDL S-stim 10h/ EDL Norm   | 0.97 | 7         | n.s |
| EDL S-stim 5d/ EDL Norm    | 2.96 | 7         | *   |
| EDL S-stim 14d/ EDL Norm   | 2.13 | 6         | *   |
| <b>MyoD RNA</b>            |      |           |     |
| SOL Norm/EDL Norm          | 0.09 | 6         | *   |
| EDL S-stim 10h/ EDL Norm   | 1.45 | 7         | n.s |
| EDL S-stim 5d/ EDL Norm    | 0.74 | 7         | n.s |
| EDL S-stim 14d/ EDL Norm   | 0.49 | 6         | *   |
| <b>Myogenin protein</b>    |      |           |     |
| SOL Norm/EDL Norm          | 8.80 | 6         | *   |
| EDL S-stim 10h/ EDL Norm   | 1.55 | 10        | **  |
| EDL S-stim 14d/ EDL Norm   | 2.76 | 7         | *   |
| SOL F-stim 14d/ SOL Norm   | 0.61 | 6         | *   |
| <b>MyoD protein</b>        |      |           |     |
| SOL Norm/EDL Norm          | 0.48 | 7         | *   |
| EDL S-stim 10h/ EDL Norm   | 1.07 | 10        | n.s |
| EDL S-stim 14d/ EDL Norm   | 0.51 | 6         | *   |
| SOL F-stim 14d/ SOL Norm   | 1.37 | 6         | n.s |
| <b>P-T115 MyoD protein</b> |      |           |     |
| SOL Norm/EDL Norm          | 3.20 | 11        | *   |
| EDL S-stim 10h/ EDL Norm   | 1.41 | 10        | *   |
| EDL S-stim 14d/ EDL Norm   | 2.10 | 7         | *   |
| SOL F-stim 14d/ SOL Norm   | 1.00 | 6         | n.s |

Data sets were compared using a Wilcoxon signed rank test. Significant differences  
 \*,  $P < 0.05$ ; \*\*,  $P < 0.01$  between different experimental muscles and normal muscles

Table S2. Fiber type distribution

|              | I                 | I/IIa             | IIa               | IIx              | I/IIx             |
|--------------|-------------------|-------------------|-------------------|------------------|-------------------|
| <b>Mouse</b> |                   |                   |                   |                  |                   |
| Normal       | 50                | 1                 | 49                | 0                | 0                 |
| Sham         | 51 <sup>n.s</sup> | 2 <sup>n.s</sup>  | 47 <sup>n.s</sup> | 0                | 0                 |
| MyoD         | 45 <sup>n.s</sup> | 2 <sup>n.s</sup>  | 50 <sup>n.s</sup> | 2 <sup>n.s</sup> | 1 <sup>n.s</sup>  |
| MyoD Denerv  | 36 <sup>***</sup> | 14 <sup>***</sup> | 37 <sup>**</sup>  | 5 <sup>*</sup>   | 8 <sup>***</sup>  |
| Denerv       | 53 <sup>n.s</sup> | 3 <sup>n.s</sup>  | 43 <sup>n.s</sup> | 1 <sup>n.s</sup> | 0                 |
| MyoD-T115    | 15 <sup>***</sup> | 34 <sup>***</sup> | 32 <sup>***</sup> | 9 <sup>***</sup> | 10 <sup>***</sup> |
| MyoD-S200    | 45 <sup>n.s</sup> | 2 <sup>n.s</sup>  | 50 <sup>n.s</sup> | 2 <sup>*</sup>   | 1 <sup>n.s</sup>  |
| <b>Rat</b>   |                   |                   |                   |                  |                   |
| Normal       | 87                | 1                 | 12                | 0                | 0                 |
| Sham         | 85 <sup>n.s</sup> | 1 <sup>n.s</sup>  | 12 <sup>n.s</sup> | 2 <sup>n.s</sup> | 0                 |
| MyoD         | 68 <sup>***</sup> | 2 <sup>n.s</sup>  | 23 <sup>***</sup> | 3 <sup>***</sup> | 4 <sup>***</sup>  |
| MyoD Denerv  | 62 <sup>***</sup> | 2 <sup>n.s</sup>  | 22 <sup>**</sup>  | 4 <sup>***</sup> | 10 <sup>***</sup> |
| Denerv       | 88 <sup>n.s</sup> | 3 <sup>n.s</sup>  | 8 <sup>n.s</sup>  | 0                | 1 <sup>n.s</sup>  |
| MyoD-T115    | 38 <sup>***</sup> | 18 <sup>***</sup> | 38 <sup>***</sup> | 0                | 6 <sup>***</sup>  |

Fiber types are defined by MyHC isoform staining (see methods). Values are given in percent. Significant differences \*, P < 0.05; \*\*, P < 0.01; \*\*\*, P < 0.001, between experimental fibers (sham, MyoD, MyoD Denerv, denerv and myoD-T115) and normal fibers (Normal).
